# Supplementary material
Source: PubMed Central journal article supplement (PMC1488925)

## Supplemental Figure 3

CBM\_1 modules repartition among sequenced plants, filamentous fungi and oomycetes

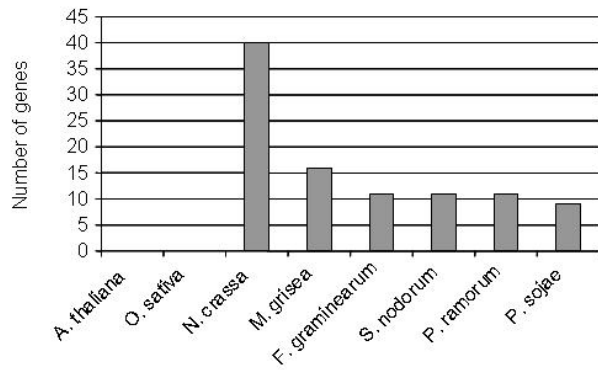

Supplement: plntcell_tpc.105.038687_3.pdf [file plntcell_tpc.105.038687_3.pdf]
