# Supplementary material
Source: PubMed Central journal article supplement (PMC1488925)

# Supplemental Figure 1

**A**

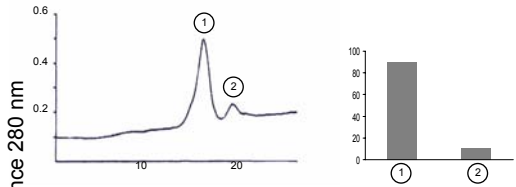

**B**

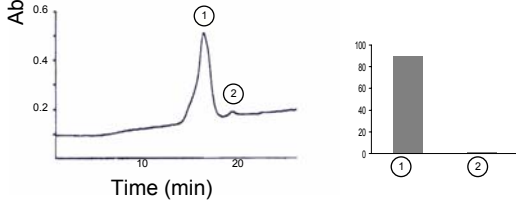

Supplement: plntcell_tpc.105.038687_1.pdf [file plntcell_tpc.105.038687_1.pdf]

# Supplemental Figure 2

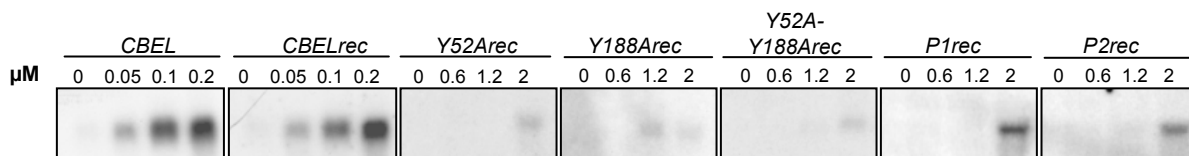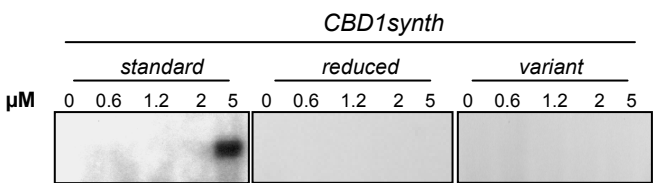

Supplement: plntcell_tpc.105.038687_2.pdf [file plntcell_tpc.105.038687_2.pdf]
